# Supplementary material for: Epinephrine affects motility, and increases adhesion, biofilm and virulence of Pseudomonas aeruginosa H103
Source: PubMed Central journal article supplement (PMC6934790; doi:10.1038/s41598-019-56666-7), 2019-12-27
Supplement: 41598_2019_56666_MOESM1_ESM.pdf [file 41598_2019_56666_MOESM1_ESM.pdf]

## **Epinephrine affects motility, and increases adhesion, biofilm and virulence of *Pseudomonas aeruginosa* H103**

Mélyssa Cambronel<sup>1</sup>, Damien Tortuel<sup>1</sup>, Kelly Biaggini<sup>1</sup>, Olivier Maillot<sup>1</sup>, Laure Taupin<sup>2</sup>, Karine Réhel<sup>2</sup>, Isabelle Rincé<sup>3</sup>, Cécile Muller<sup>3</sup>, Julie Hardouin<sup>4</sup>, Marc Feuilleley<sup>1</sup>, Sophie Rodrigues<sup>1</sup>, Nathalie Connil\*<sup>1</sup>

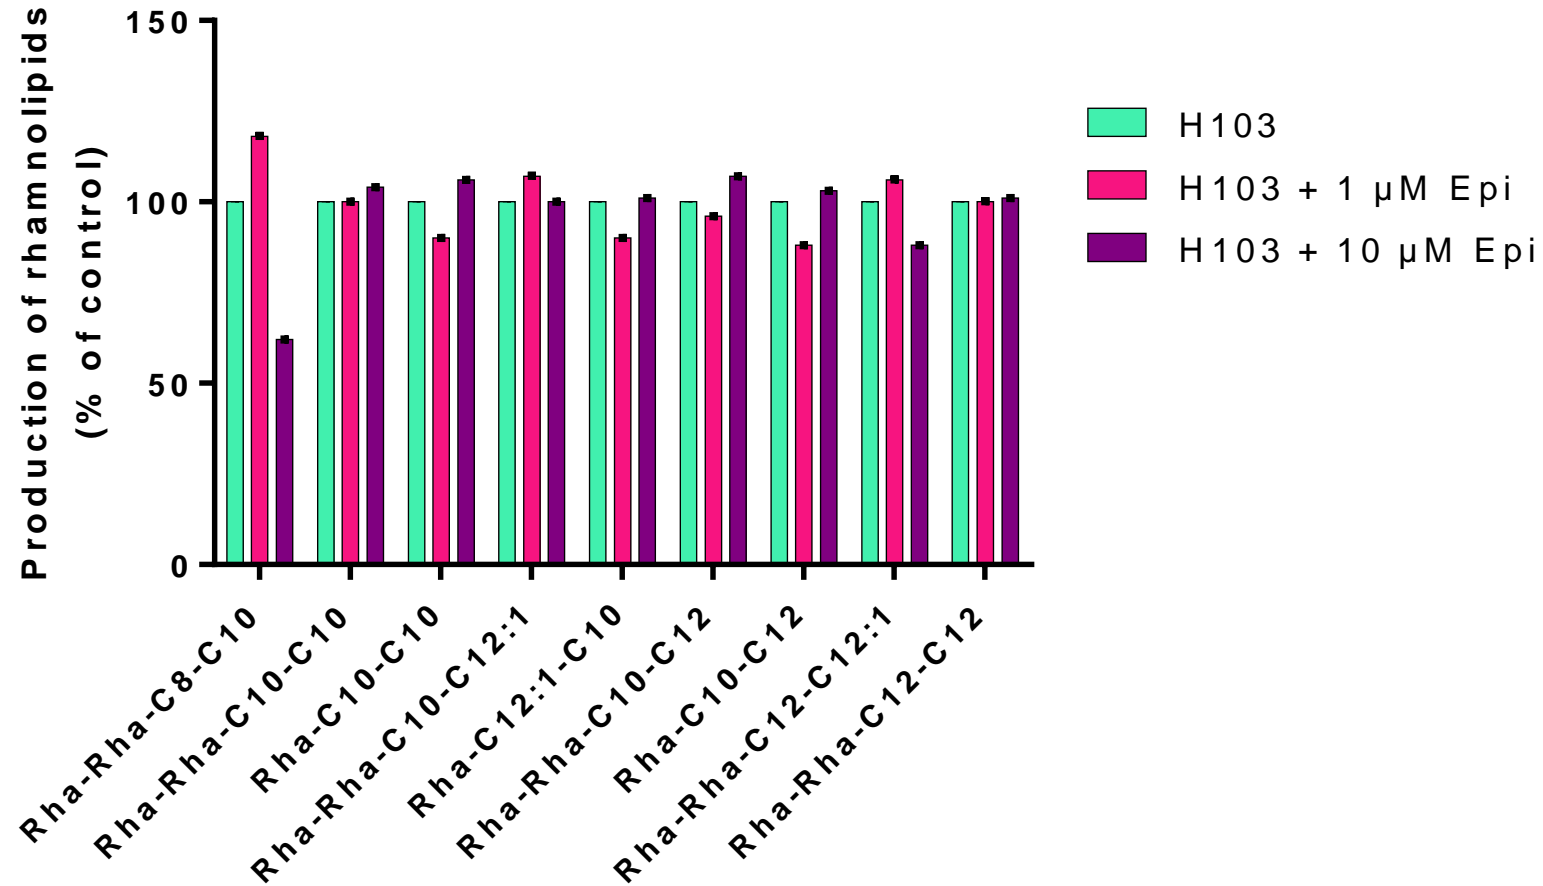

### Supplementary data 1. Effect of Epi on rhamnolipids production

Rhamnolipids were extracted after 24 h culture, with or without Epi at 1 and 10 μM and analyzed using mass spectrometry LC-MS. The errors bars indicate the standard error of the mean (SEM) of at least three independent experiments.

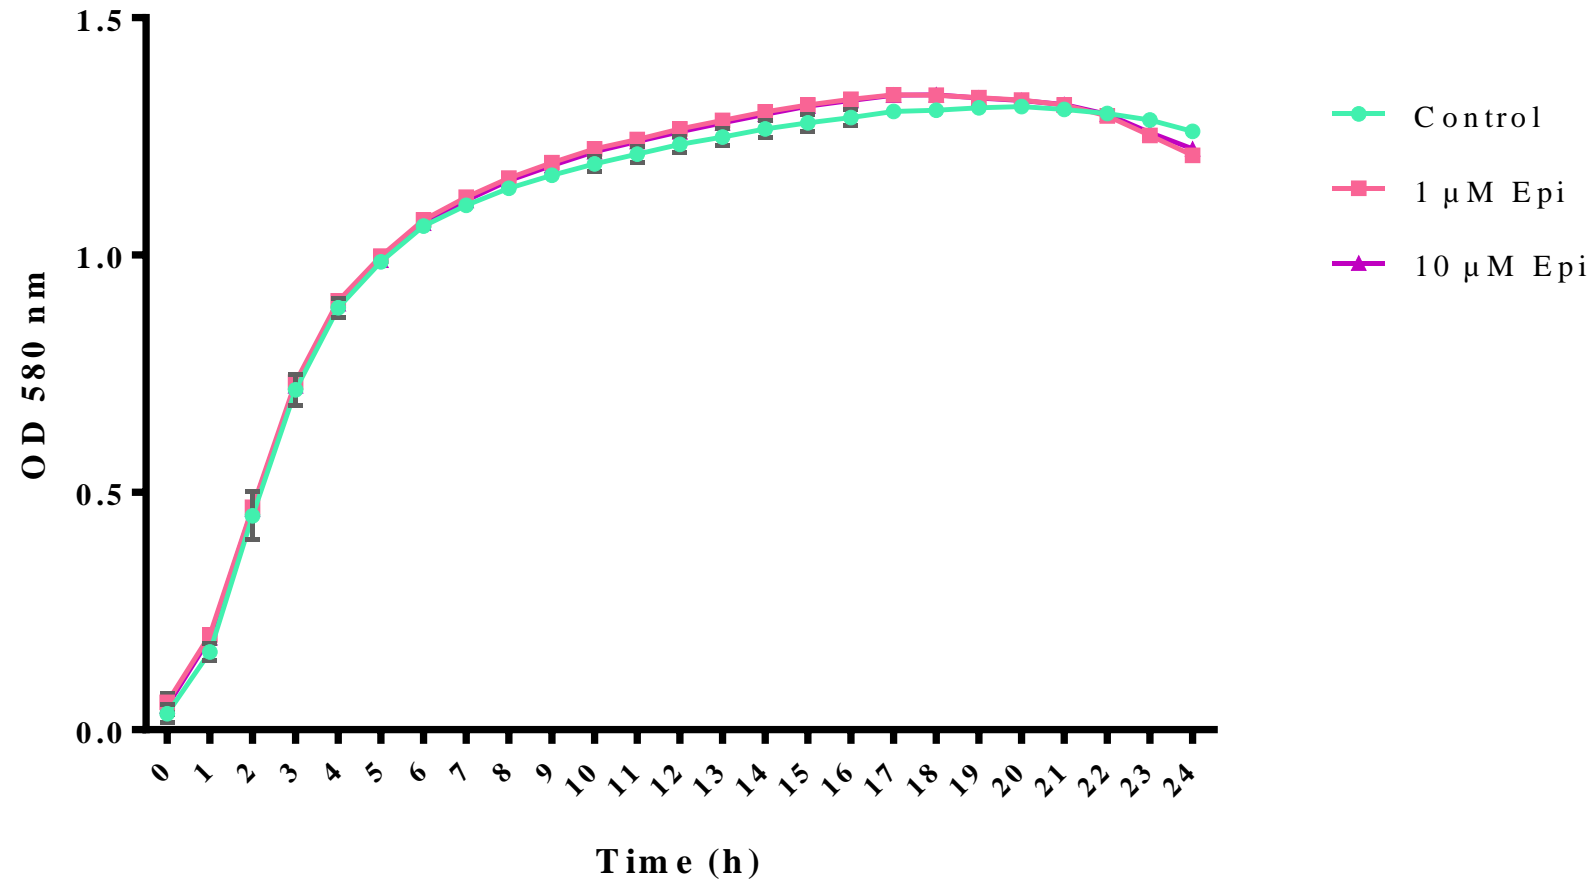

### Supplementary data 2. *P. aeruginosa* growth in presence of Epi

*P. aeruginosa* H103 was grown in LB medium supplemented or not with Epi (1 or 10 μM). The kinetic was performed in a microplate reader and OD<sub>580</sub> was monitored every 15 min for 24 h at 37°C with orbital shaking.
